# Supplementary material for: Extremely promising monolayer materials with robust ferroelectricity and extraordinary piezoelectricity: δ-AsN, δ-SbN, and δ-BiN
Source: Royal Society of Chemistry journal article supplement (doi:10.1039/d2nr05344f), 2023-01-01
Supplement: d2nr05344f1.pdf [file d2nr05344f1.pdf]

## Supplemental Materials

# Extremely Promising Monolayer Materials with Robust Ferroelectricity and Extraordinary Piezoelectricity: $\delta$ -AsN, $\delta$ -SbN, and $\delta$ -BiN

Yuwen Zhang<sup>1,2</sup>, Tao Ouyang<sup>1,2,\*</sup>, Chaoyu He<sup>1,2,\*</sup>, Jin Li<sup>1,2</sup>, and Chao Tang<sup>1,2,\*</sup>

<sup>1</sup> *School of Physics and Optoelectronics, Xiangtan University, Xiangtan 411105, China*

<sup>2</sup> *Hunan Key Laboratory for Micro-nano Energy Materials and Devices, Xiangtan University,  
Hunan 411105, China*

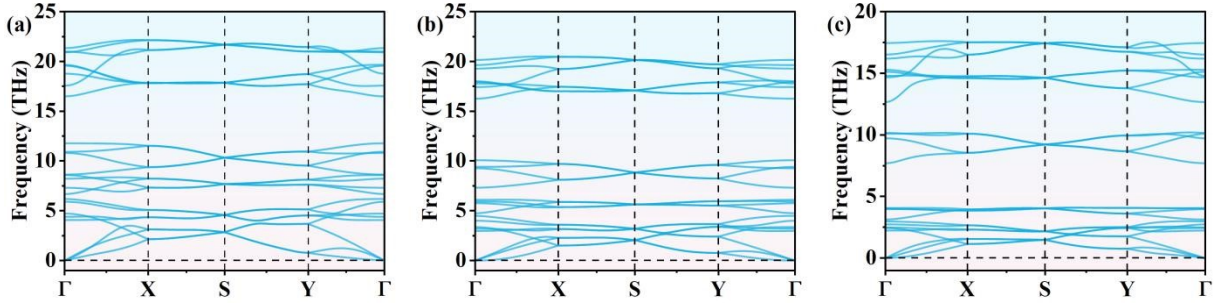

**Fig. S1** Typical phonon dispersions of (a)  $\delta$ -AsN, (b)  $\delta$ -SbN, and (c)  $\delta$ -BiN monolayer binary compounds.

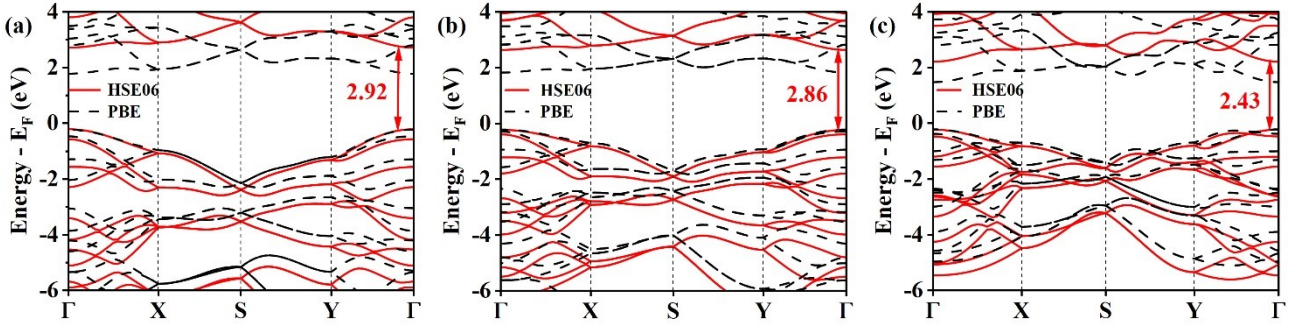

**Fig. S2** Calculated DFT-PBE and HSE06 band structures of monolayer binary compounds of (a)  $\delta$ -AsN, (b)  $\delta$ -SbN and (c)  $\delta$ -BiN at zero strain. The positions of band gaps are highlighted by red double-sided arrow and the Fermi level is set at zero.

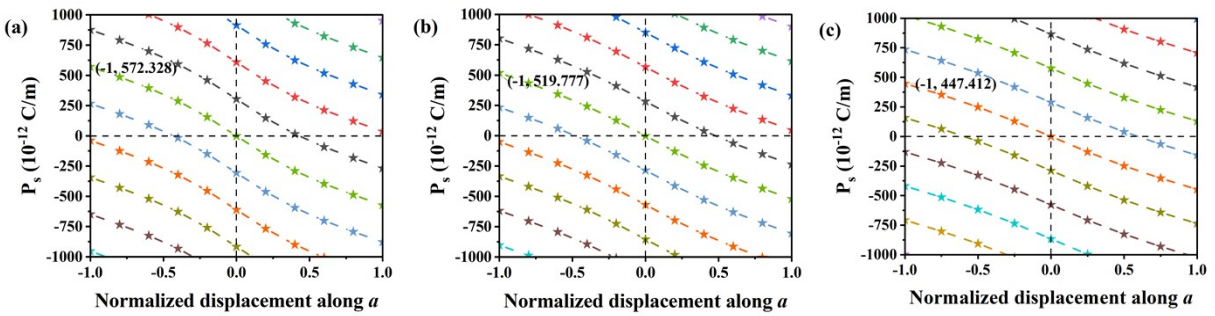

**Fig. S3** The total polarization with spin-orbit coupling for (a)  $\delta$ -AsN, (b)  $\delta$ -SbN, and (c)  $\delta$ -BiN monolayers as a function of normalized displacement.

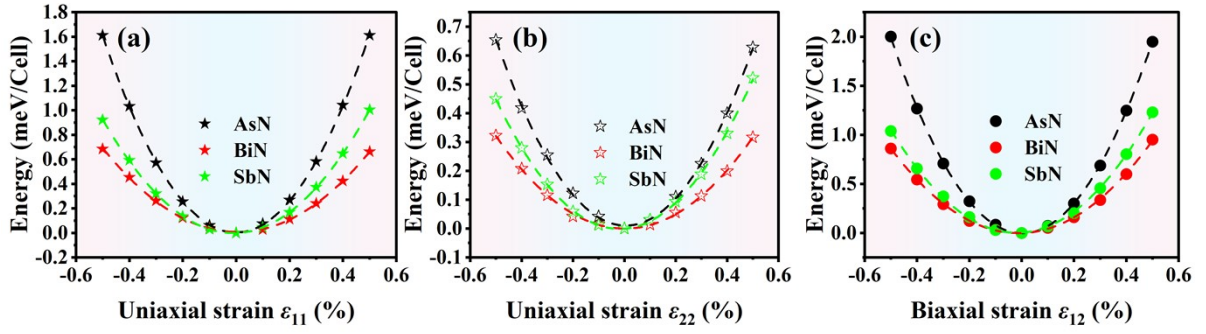

**Fig. S4** Relaxed-ion elastic stiffness coefficients (a)  $C_{11}$ , (b)  $C_{22}$ , and (c)  $C_{12}$  of  $\delta$ -AsN,  $\delta$ -SbN, and  $\delta$ -BiN are calculated by the energy-strain method. ( $\epsilon_{11} = \Delta a/a_0$ ;  $\epsilon_{22} = \Delta b/b_0$ ;  $\epsilon_{12} = \Delta a/a_0 = \Delta b/b_0$ ,  $a_0$  and  $b_0$  are lattice constants without strain applied)

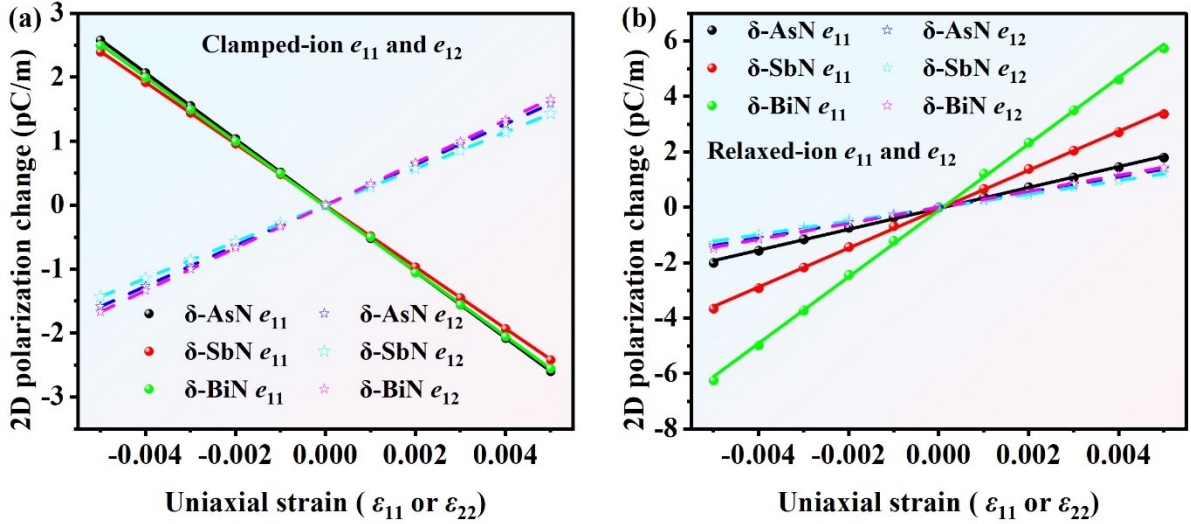

**Fig. S5** (a) Clamped-ion piezoelectric coefficients  $e_{11}$  and  $e_{12}$  without spin-orbit coupling. (b) Relaxed-ion piezoelectric coefficients  $e_{11}$  and  $e_{12}$  with spin-orbit coupling.

**Table S1** Energy comparison between  $\delta$ -phase and  $\alpha$ -phase of AsN, SbN, and BiN at GGA-PBE, meta-GGA, and HSE06 levels.

| Materials | Methods       | $\alpha$ -phase (eV/atom) | $\delta$ -phase (eV/atom) | $\Delta E$ (meV/atom) |
|-----------|---------------|---------------------------|---------------------------|-----------------------|
| AsN       | GGA-PBE       | -6.138                    | -6.156                    | 18                    |
|           | SCAN meta-GGA | -14.350                   | -14.367                   | 17                    |
|           | HSE06         | -7.578                    | -7.596                    | 18                    |
| SbN       | GGA-PBE       | -5.829                    | -5.877                    | 48                    |
|           | SCAN meta-GGA | -22.750                   | -22.801                   | 51                    |
|           | HSE06         | -7.237                    | -7.296                    | 56                    |
| BiN       | GGA-PBE       | -5.489                    | -5.504                    | 15                    |
|           | SCAN meta-GGA | -43.021                   | -43.035                   | 14                    |
|           | HSE06         | -6.682                    | -6.712                    | 30                    |

**Table S2** Lattice Parameters, Relaxed-Ion and Clamped-Ion Elastic Stiffness Coefficients  $C_{11}$ ,  $C_{22}$ , and  $C_{12}$  for  $\delta$ -AsN,  $\delta$ -SbN, and  $\delta$ -BiN Monolayers at the DFT-PBE Level. The  $C_{11}$ ,  $C_{22}$ , and  $C_{12}$  are in units of N/m.

| Material      | Lattice Parameters |         |         | Relaxed-ion |          |          | Clamped-ion |          |          |
|---------------|--------------------|---------|---------|-------------|----------|----------|-------------|----------|----------|
|               | $a$ (Å)            | $b$ (Å) | $h$ (Å) | $C_{11}$    | $C_{22}$ | $C_{12}$ | $C_{11}$    | $C_{22}$ | $C_{12}$ |
| $\delta$ -AsN | 4.80               | 5.25    | 2.11    | 81.77       | 31.97    | -6.69    | 142.12      | 117.85   | 27.48    |
| $\delta$ -SbN | 5.18               | 5.64    | 2.34    | 42.38       | 21.20    | -6.88    | 120.68      | 105.24   | 26.68    |
| $\delta$ -BiN | 5.26               | 5.55    | 2.50    | 29.46       | 14.01    | -1.90    | 115.79      | 107.34   | 25.76    |

**Table S3** Piezoelectric Coefficients ( $e_{11}$ ,  $e_{12}$ ,  $d_{11}$ , and  $d_{12}$ ) for  $\delta$ -AsN,  $\delta$ -SbN, and  $\delta$ -BiN Monolayers by Berry's Phase methods. The  $e_{11}$  and  $e_{12}$  are in units of  $10^{-10}$  C/m, and  $d_{11}$  and  $d_{12}$  are in units of pm/V.

| Material      | Relaxed-ion |          |          |          | Clamped-ion |          |          |          |
|---------------|-------------|----------|----------|----------|-------------|----------|----------|----------|
|               | $e_{11}$    | $e_{12}$ | $d_{11}$ | $d_{12}$ | $e_{11}$    | $e_{12}$ | $d_{11}$ | $d_{12}$ |
| $\delta$ -AsN | 3.76        | 2.75     | 5.39     | 9.73     | -5.19       | 3.17     | -4.37    | 3.71     |
| $\delta$ -SbN | 7.05        | 2.46     | 19.55    | 17.95    | -4.81       | 2.86     | -4.86    | 3.95     |
| $\delta$ -BiN | 12.42       | 2.88     | 43.87    | 26.50    | -5.07       | 3.33     | -5.35    | 4.39     |
